# Supplementary material for: Single Blinded Left-to-Right Comparison Study of Excimer Laser Versus Pulsed Dye Laser for the Treatment of Nail Psoriasis
Source: Springer Nature journal article supplement (doi:10.1007/s13555-014-0057-y), 2014-07-02
Supplement: MOESM1 [file 9271038]

- Nail psoriasis is relatively difficult to treat; this is the first study assessing both the excimer and PDL lasers in nail psoriasis.
- In this left-to-right comparison study, excimer laser versus PDL for the treatment of nail psoriasis was evaluated in 42 patients; a total of 304 nail changes, 148 with excimer laser and 156 with PDL, were treated.
- The mean Nail Psoriasis Severity Index (NAPSI) score in nails treated with excimer laser was 29.8 at baseline, reduced to 16.3 at week 24; in PDL treated nails, the NAPSI scores dropped from 29.5 at baseline to 3.2 at week 24.
- NAPSI improvement was significantly greater in PDL than excimer ( $P = 0.001$ ; Wilcoxon signed-rank test).
- When compared to excimer laser, PDL demonstrated a good response for treating nail psoriasis, with minimal side effects.

This summary slide represents the opinions of the authors. No funding or sponsorship was received for this study or publication of this article. Editorial assistance in the preparation of this manuscript was provided by Dr Yashpal Manchanda, Farwaniya Hospital, Kuwait. For a full list of acknowledgments and conflicts of interest for all authors of this article, please see the full text online. Copyright © The Author(s) 2014. Creative Commons Attribution Noncommercial License (CC BY-NC).
